# Supplementary material for: Bioactivity of Wild and Cultivated Legumes: Phytochemical Content and Antioxidant Properties
Source: MDPI journal article supplement (doi:10.3390/antiox12040852), 2023-04-01
Supplement: s1 [file s1]

## **SUPPLEMENTARY MATERIAL**

### **S1: Calculated *p*-values for Tables 2, 3, 4**

#### ***p*-values for Table 2**

| Phytochemicals                        | L01   | L02   | L03    | L04   | L05   | L06    | L07    | L08    |
|---------------------------------------|-------|-------|--------|-------|-------|--------|--------|--------|
| TPC <sup>1</sup>                      | 0.001 | 0.02  | 0.0002 | 0.004 | 0.004 | 0.01   | 0.003  | 0.02   |
| TTC <sup>2</sup>                      | 0.001 |       | 0.003  |       | 0.001 | 0.0007 | 0.0008 | 0.0008 |
| Procyanidin B1 <sup>3</sup>           |       |       |        |       |       |        |        |        |
| Chlorogenic Acid <sup>3</sup>         | 0.004 |       | 0.006  |       |       |        |        | 0.003  |
| Procyanidin B2 <sup>3</sup>           |       |       | 0.001  |       |       |        |        |        |
| Epicatechin <sup>3</sup>              |       |       | 0.01   |       |       |        |        |        |
| Epigallocatechin Gallate <sup>3</sup> |       |       | 0.001  |       |       |        |        |        |
| Hesperidin <sup>3</sup>               |       |       |        |       |       |        |        |        |
| Isoquercetin <sup>3</sup>             | 0.01  | 0.001 | 0.002  | 0.02  | 0.006 | 0.01   | 0.008  | 0.03   |
| Rutin <sup>3</sup>                    | 0.05  | 0.006 | 0.006  |       |       |        |        | 0.002  |
| Quercetin <sup>3</sup>                | 0.04  |       | 0.04   | 0.04  | 0.03  |        |        | 0.04   |
| Apigenin <sup>3</sup>                 |       |       | 0.03   | 0.05  | 0.03  | 0.007  | 0.05   | 0.05   |
| Kaempferol <sup>3</sup>               |       |       |        |       |       |        | 0.05   |        |

#### ***p*-values for Table 3**

| Carotenoids                         | L01      | L02      | L03      | L04      | L05       | L06         | L07     | L08      |
|-------------------------------------|----------|----------|----------|----------|-----------|-------------|---------|----------|
| TCC Hex <sup>1</sup>                | 6.00E-06 | 0.00001  | 6.00E-06 | 0.000005 | 0.0000009 | 0.0000007   | 0.00002 | 0.000004 |
| TCC DCM <sup>1</sup>                | 0.000004 | 3.00E-07 | 3.00E-07 | 0.000006 | 0.00001   | 0.000345901 | 0.0002  | 0.000009 |
| Lutein <sup>2</sup>                 | 0.01     | 0.0006   |          | 0.0003   |           | 0.00008     |         |          |
| $\beta$ -cryptoxanthin <sup>2</sup> |          |          | 0.00009  |          |           |             |         | 0.0001   |
| $\alpha$ -carotene <sup>2</sup>     | 0.0001   |          | 0.0001   | 0.0001   |           |             |         | 0.0001   |
| $\beta$ -carotene <sup>2</sup>      | 0.005    |          |          | 0.003    |           | 0.05        | 0.02    | 0.0008   |

### **p-values for Table 4**

| Sample | FRAP (mmol Fe(II)/g extract) |        |          | DPPH (mg TE/g extract) |        |       |
|--------|------------------------------|--------|----------|------------------------|--------|-------|
|        | Hex                          | DCM    | MeOH     | Hex                    | DCM    | MeOH  |
| L01    | 0.02                         | 0.008  | 0.05     |                        | 0.01   | 0.008 |
| L02    | 0.008                        | 0.004  | 0.003    | 0.006                  | 0.05   | 0.02  |
| L03    | 0.004                        | 0.02   | 0.05     | 0.003                  | 0.01   | 0.02  |
| L04    | 0.002                        | 0.003  | 0.0008   | 0.01                   | 0.0005 | 0.01  |
| L05    | 0.03                         | 0.005  | 0.004    | 0.006                  | 0.02   | 0.02  |
| L06    | 0.03                         | 0.001  | 0.004    | 0.001                  | 0.04   | 0.02  |
| L07    | 0.008                        | 0.0006 | 0.000003 |                        | 0.005  |       |
| L08    | 0.004                        | 0.001  | 0.007    | 0.01                   | 0.02   | 0.01  |

### **S2: Results of Bonferroni tests**

#### **Total Phenolic Content**

Comparison of var2 by var1 (Bonferroni)

Row Mean-|

Col Mean |    L01    L02    L03    L04    L05    L06    L07

-----+-----  
-----

|     |        |        |       |        |        |        |       |
|-----|--------|--------|-------|--------|--------|--------|-------|
| L02 | 0.000  |        |       |        |        |        |       |
| L03 | 0.000  | 0.000  |       |        |        |        |       |
| L04 | 0.000  | 0.673* | 0.000 |        |        |        |       |
| L05 | 0.000  | 0.031  | 0.000 | 1.000* |        |        |       |
| L06 | 0.000  | 0.001  | 0.000 | 0.175* | 1.000* |        |       |
| L07 | 1.000* | 0.006  | 0.000 | 0.000  | 0.000  | 0.000  |       |
| L08 | 0.000  | 0.000  | 0.000 | 0.002  | 0.048  | 1.000* | 0.000 |

\* Insignificant (L01-L07, L02-L04, L04-L05, L04-L06, L05-L06, L06-L08)

#### **Total Tannin Content**

Comparison of var2 by var1 (Bonferroni)



### Total Carotenoid Content (Dichloromethane)

Comparison of var3 by var1 (Bonferroni)

Row Mean-|

Col Mean | L01 L02 L03 L04 L05 L06 L07

-----+-----  
-----

|     |       |       |       |       |       |       |       |
|-----|-------|-------|-------|-------|-------|-------|-------|
| L02 | 0.000 |       |       |       |       |       |       |
| L03 | 0.000 | 0.000 |       |       |       |       |       |
| L04 | 0.000 | 0.000 | 0.000 |       |       |       |       |
| L05 | 0.000 | 0.000 | 0.000 | 0.000 |       |       |       |
| L06 | 0.000 | 0.000 | 0.000 | 0.000 | 0.000 |       |       |
| L07 | 0.000 | 0.000 | 0.000 | 0.000 | 0.000 | 0.000 |       |
| L08 | 0.000 | 0.000 | 0.000 | 0.000 | 0.000 | 0.000 | 0.000 |

### DPPH (Hex)

Comparison of var3 by var1 (Bonferroni)

Row Mean-|

Col Mean | L01 L02 L03 L04 L05 L06 L07

-----+-----  
-----

|     |        |        |        |        |        |        |        |
|-----|--------|--------|--------|--------|--------|--------|--------|
| L02 | 1.000* |        |        |        |        |        |        |
| L03 | 0.947* | 1.000* |        |        |        |        |        |
| L04 | 0.009  | 0.186* | 0.250* |        |        |        |        |
| L05 | 0.197* | 1.000* | 1.000* | 1.000* |        |        |        |
| L06 | 0.000  | 0.001  | 0.002  | 0.070* | 0.004  |        |        |
| L07 | 1.000* | 1.000* | 1.000* | 0.047  | 1.000* | 0.001  |        |
| L08 | 0.010  | 0.199* | 0.268* | 1.000* | 1.000* | 0.066* | 0.050* |

\* Insignificant (L01-L02, L01-L03, L01-L05, L01-L07, L02-L03, L02-L04, L02-L05, L02-L07, L02-L08, L03-L04, L03-L05, L03-L07, L03-L04, L03-L08, L04-L05, L04-L06, L04-L08, L05-L07, L05-L08, L07-L08)

DPPH (DCM)

Comparison of var4 by var1 (Bonferroni)

| Row Mean-   |        |       |        |        |       |       |       |
|-------------|--------|-------|--------|--------|-------|-------|-------|
| Col Mean    | L01    | L02   | L03    | L04    | L05   | L06   | L07   |
| -----+----- |        |       |        |        |       |       |       |
| -----       |        |       |        |        |       |       |       |
| L02         | 1.000* |       |        |        |       |       |       |
| L03         | 0.001  | 0.000 |        |        |       |       |       |
| L04         | 0.004  | 0.001 | 1.000* |        |       |       |       |
| L05         | 0.000  | 0.000 | 0.000  | 0.000  |       |       |       |
| L06         |        | 0.005 | 0.067* | 0.000  | 0.000 | 0.000 |       |
| L07         | 0.049  | 0.004 | 0.065* | 1.000* | 0.000 | 0.000 |       |
| L08         | 0.000  | 0.000 | 0.000  | 0.000  | 0.000 | 0.010 | 0.000 |

\* Insignificant (L01-L02, L02-L06, L03-L04, L03-L07, L04-L07)

DPPH (MeOH)

Comparison of var2 by var1 (Bonferroni)

| Row Mean-   |       |       |       |       |       |       |       |
|-------------|-------|-------|-------|-------|-------|-------|-------|
| Col Mean    | L01   | L02   | L03   | L04   | L05   | L06   | L07   |
| -----+----- |       |       |       |       |       |       |       |
| -----       |       |       |       |       |       |       |       |
| L02         | 0.000 |       |       |       |       |       |       |
| L03         | 0.000 | 0.000 |       |       |       |       |       |
| L04         | 0.000 | 0.000 | 0.000 |       |       |       |       |
| L05         | 0.000 | 0.000 | 0.000 | 0.000 |       |       |       |
| L06         | 0.000 | 0.017 | 0.000 | 0.000 | 0.000 |       |       |
| L07         |       | 0.000 | 0.000 | 0.000 | 0.000 | 0.000 | 0.000 |
| L08         |       | 0.261 | 0.010 | 0.000 | 0.000 | 0.000 | 0.000 |

### FRAP (Hex)

Comparison of var3 by var1 (Bonferroni)

Row Mean-|

Col Mean | L01 L02 L03 L04 L05 L06 L07

-----+-----  
-----

|     |        |        |        |        |         |       |       |
|-----|--------|--------|--------|--------|---------|-------|-------|
| L02 | 0.004  |        |        |        |         |       |       |
| L03 | 0.518* | 0.124* |        |        |         |       |       |
| L04 | 0.000  | 0.000  | 0.000  |        |         |       |       |
| L05 | 0.000  | 0.000  | 0.000  | 0.000  |         |       |       |
| L06 | 0.000  | 0.000  | 0.000  | 0.000  | 0.000   |       |       |
| L07 |        | 0.311* | 0.202* | 1.000* | 0.000   | 0.000 | 0.000 |
| L08 | 0.000  | 0.000  | 0.000  | 0.000  | 0.080 * | 0.000 | 0.000 |

\* Insignificant (L01-L03, L01-L07, L02-L03, L02-L07, L03-L07, L05-L08)

### FRAP (DCM)

Comparison of var4 by var1 (Bonferroni)

Row Mean-|

Col Mean | L01 L02 L03 L04 L05 L06 L07

-----+-----  
-----

|     |       |       |       |       |       |       |       |
|-----|-------|-------|-------|-------|-------|-------|-------|
| L02 |       | 0.000 |       |       |       |       |       |
| L03 | 0.000 | 0.000 |       |       |       |       |       |
| L04 | 0.000 | 0.000 | 0.000 |       |       |       |       |
| L05 | 0.000 | 0.000 | 0.000 | 0.000 |       |       |       |
| L06 |       | 0.000 | 0.000 | 0.000 | 0.000 | 0.000 |       |
| L07 | 0.000 | 0.001 | 0.000 | 0.000 | 0.000 | 0.000 |       |
| L08 | 0.000 | 0.000 | 0.000 | 0.000 | 0.000 | 0.000 | 0.000 |

### FRAP (MeOH)

Comparison of var2 by var1 (Bonferroni)

Row Mean-|

Col Mean | L01 L02 L03 L04 L05 L06 L07

|     |         |         |         |       |       |       |       |
|-----|---------|---------|---------|-------|-------|-------|-------|
|     |         |         |         |       |       |       |       |
|     |         |         |         |       |       |       |       |
|     |         |         |         |       |       |       |       |
| L02 | 1.000   |         |         |       |       |       |       |
| L03 | 0.004** | 0.006** |         |       |       |       |       |
| L04 | 1.000   | 1.000   | 0.058   |       |       |       |       |
| L05 | 1.000   | 1.000   | 0.037** | 1.000 |       |       |       |
| L06 | 1.000   | 1.000   | 0.013** | 1.000 | 1.000 |       |       |
| L07 | 1.000   | 1.000   | 0.003** | 0.810 | 1.000 | 1.000 |       |
| L08 | 1.000   | 1.000   | 0.011** | 1.000 | 1.000 | 1.000 | 1.000 |

\*\* Significant (L01-L03, L02-L03, L03-L05, L03-L06, L03-L07, L03-L08)

### Antioxidants

#### Procyanidin B1

Comparison of var2 by var1 (Bonferroni)

Row Mean-|

Col Mean | L01 L02 L03 L04 L05 L06 L07

|     |       |       |       |       |       |       |       |
|-----|-------|-------|-------|-------|-------|-------|-------|
|     |       |       |       |       |       |       |       |
|     |       |       |       |       |       |       |       |
|     |       |       |       |       |       |       |       |
| L02 | 1.000 |       |       |       |       |       |       |
| L03 | 1.000 | 1.000 |       |       |       |       |       |
| L04 | 1.000 | 1.000 | 1.000 |       |       |       |       |
| L05 | 1.000 | 1.000 | 1.000 | 1.000 |       |       |       |
| L06 | 1.000 | 1.000 | 1.000 | 1.000 | 1.000 |       |       |
| L07 | 1.000 | 1.000 | 1.000 | 1.000 | 1.000 | 1.000 |       |
| L08 | 1.000 | 1.000 | 1.000 | 1.000 | 1.000 | 1.000 | 1.000 |

All Insignificant

#### Chlorogenic Acid

Comparison of var3 by var1 (Bonferroni)

Row Mean-|

Col Mean |      L01      L02      L03      L04      L05      L06      L07

-----+-----  
-----

|     |  |         |         |         |       |       |       |
|-----|--|---------|---------|---------|-------|-------|-------|
| L02 |  | 1.000   |         |         |       |       |       |
| L03 |  | 0.000** | 0.000** |         |       |       |       |
| L04 |  | 1.000   | 1.000   | 0.000** |       |       |       |
| L05 |  | 1.000   | 1.000   | 0.000** | 1.000 |       |       |
| L06 |  | 1.000   | 1.000   | 0.000** | 1.000 | 1.000 |       |
| L07 |  | 1.000   | 1.000   | 0.000** | 1.000 | 1.000 | 1.000 |
| L08 |  | 1.000   | 1.000   | 0.000** | 1.000 | 1.000 | 1.000 |

\*\* Significant (L01-L03, L02-L03, L03-L04, L03-L05, L03-L06, L03-L07, L03-L08)

### Procyanidin B2

Comparison of var4 by var1 (Bonferroni)

Row Mean-|

Col Mean |      L01      L02      L03      L04      L05      L06      L07

-----+-----  
-----

|     |  |         |         |         |       |       |       |
|-----|--|---------|---------|---------|-------|-------|-------|
| L02 |  | 1.000   |         |         |       |       |       |
| L03 |  | 0.000** | 0.000** |         |       |       |       |
| L04 |  | 1.000   | 1.000   | 0.000** |       |       |       |
| L05 |  | 1.000   | 1.000   | 0.000** | 1.000 |       |       |
| L06 |  | 1.000   | 1.000   | 0.000** | 1.000 | 1.000 |       |
| L07 |  | 1.000   | 1.000   | 0.000** | 1.000 | 1.000 | 1.000 |
| L08 |  | 1.000   | 1.000   | 0.000** | 1.000 | 1.000 | 1.000 |

\*\* Significant (L01-L03, L02-L03, L03-L04, L03-L05, L03-L06, L03-L07, L03-L08)

### Epicatechin

Comparison of var5 by var1 (Bonferroni)

Row Mean-|



| Col Mean    | L01     | L02     | L03     | L04     | L05   | L06   | L07   |
|-------------|---------|---------|---------|---------|-------|-------|-------|
| -----+----- |         |         |         |         |       |       |       |
| -----       |         |         |         |         |       |       |       |
| L02         |         | 1.000   |         |         |       |       |       |
| L03         | 0.035** | 0.036** |         |         |       |       |       |
| L04         | 1.000   | 1.000   | 0.035** |         |       |       |       |
| L05         |         | 1.000   | 1.000   | 0.036** | 1.000 |       |       |
| L06         | 1.000   | 1.000   | 0.035** | 1.000   | 1.000 |       |       |
| L07         | 1.000   | 1.000   | 0.036** | 1.000   | 1.000 | 1.000 |       |
| L08         |         | 1.000   | 1.000   | 0.036** | 1.000 | 1.000 | 1.000 |

\*\* Significant (L01-L03, L02-L03, L03-L04, L03-L05, L03-L06, L03-L07, L03-L08)

### Epigallocatechin Gallate

Comparison of var6 by var1 (Bonferroni)

Row Mean-|

| Col Mean    | L01   | L02   | L03   | L04   | L05   | L06   | L07   |
|-------------|-------|-------|-------|-------|-------|-------|-------|
| -----+----- |       |       |       |       |       |       |       |
| -----       |       |       |       |       |       |       |       |
| L02         | 0.339 |       |       |       |       |       |       |
| L03         | 0.339 | 1.000 |       |       |       |       |       |
| L04         | 1.000 | 1.000 | 1.000 |       |       |       |       |
| L05         | 0.339 | 1.000 | 1.000 | 1.000 |       |       |       |
| L06         | 0.339 | 1.000 | 1.000 | 1.000 | 1.000 |       |       |
| L07         | 0.339 | 1.000 | 1.000 | 1.000 | 1.000 | 1.000 |       |
| L08         | 0.339 | 1.000 | 1.000 | 1.000 | 1.000 | 1.000 | 1.000 |

All Insignificant

### Rutin

Comparison of var7 by var1 (Bonferroni)

Row Mean-|

| Col Mean    | L01     | L02     | L03     | L04   | L05   | L06   | L07   |
|-------------|---------|---------|---------|-------|-------|-------|-------|
| -----+----- |         |         |         |       |       |       |       |
| -----       |         |         |         |       |       |       |       |
| L02         | 0.001** |         |         |       |       |       |       |
| L03         | 0.000** | 0.000** |         |       |       |       |       |
| L04         | 0.000** | 1.000   | 0.000** |       |       |       |       |
| L05         | 0.000** | 1.000   | 0.000** | 1.000 |       |       |       |
| L06         | 0.000** | 1.000   | 0.000** | 1.000 | 1.000 |       |       |
| L07         | 0.000** | 1.000   | 0.000** | 1.000 | 1.000 | 1.000 |       |
| L08         | 0.001** | 1.000   | 0.000** | 1.000 | 1.000 | 1.000 | 1.000 |

\*\* Significant (L01-All the other samples, L02-L03, L03-L04, L03-L05, L03-L06, L03-L07, L03-L08)

### Isoquercetin

Comparison of var8 by var1 (Bonferroni)

| Row Mean-   |       |       |       |       |       |       |       |
|-------------|-------|-------|-------|-------|-------|-------|-------|
| Col Mean    | L01   | L02   | L03   | L04   | L05   | L06   | L07   |
| -----+----- |       |       |       |       |       |       |       |
| -----       |       |       |       |       |       |       |       |
| L02         | 1.000 |       |       |       |       |       |       |
| L03         | 1.000 | 1.000 |       |       |       |       |       |
| L04         |       | 1.000 | 1.000 | 1.000 |       |       |       |
| L05         | 1.000 | 1.000 | 1.000 | 1.000 |       |       |       |
| L06         | 1.000 | 1.000 | 0.620 | 0.620 | 0.620 |       |       |
| L07         | 1.000 | 1.000 | 1.000 | 1.000 | 1.000 | 1.000 |       |
| L08         | 1.000 | 1.000 | 1.000 | 1.000 | 1.000 | 0.620 | 1.000 |

All Insignificant

### Herperidin

Comparison of var9 by var1 (Bonferroni)

| Row Mean- |     |     |     |     |     |     |     |
|-----------|-----|-----|-----|-----|-----|-----|-----|
| Col Mean  | L01 | L02 | L03 | L04 | L05 | L06 | L07 |

|     |         |       |       |       |       |       |       |
|-----|---------|-------|-------|-------|-------|-------|-------|
|     |         |       |       |       |       |       |       |
|     |         |       |       |       |       |       |       |
| L02 | 0.000** |       |       |       |       |       |       |
| L03 | 0.000** | 1.000 |       |       |       |       |       |
| L04 | 0.000** | 1.000 | 1.000 |       |       |       |       |
| L05 | 0.000** | 1.000 | 1.000 | 1.000 |       |       |       |
| L06 | 0.000** | 1.000 | 1.000 | 1.000 | 1.000 |       |       |
| L07 | 0.000** | 1.000 | 1.000 | 1.000 | 1.000 | 1.000 |       |
| L08 | 0.000** | 1.000 | 1.000 | 1.000 | 1.000 | 1.000 | 1.000 |

\*\*Significant (L01-All the other samples)

### Quercetin

Comparison of var10 by var1 (Bonferroni)

Row Mean-|

Col Mean | L01 L02 L03 L04 L05 L06 L07

|     |       |       |       |       |       |       |       |
|-----|-------|-------|-------|-------|-------|-------|-------|
|     |       |       |       |       |       |       |       |
|     |       |       |       |       |       |       |       |
| L02 | 1.000 |       |       |       |       |       |       |
| L03 | 1.000 | 1.000 |       |       |       |       |       |
| L04 | 1.000 | 1.000 | 1.000 |       |       |       |       |
| L05 | 1.000 | 1.000 | 1.000 | 1.000 |       |       |       |
| L06 |       | 1.000 | 1.000 | 1.000 | 1.000 | 1.000 |       |
| L07 |       | 1.000 | 1.000 | 1.000 | 1.000 | 1.000 | 1.000 |
| L08 |       | 1.000 | 1.000 | 1.000 | 1.000 | 1.000 | 1.000 |

All Insignificant

### Apigenin

Comparison of var11 by var1 (Bonferroni)

Row Mean-|

Col Mean | L01 L02 L03 L04 L05 L06 L07

|     |       |       |       |       |       |       |       |
|-----|-------|-------|-------|-------|-------|-------|-------|
|     |       |       |       |       |       |       |       |
|     |       |       |       |       |       |       |       |
| L02 | 1.000 |       |       |       |       |       |       |
| L03 | 1.000 | 1.000 |       |       |       |       |       |
| L04 | 1.000 | 1.000 | 1.000 |       |       |       |       |
| L05 | 1.000 | 1.000 | 1.000 | 1.000 |       |       |       |
| L06 | 1.000 | 1.000 | 1.000 | 1.000 | 1.000 |       |       |
| L07 | 0.088 | 0.080 | 0.098 | 0.553 | 0.088 | 0.201 |       |
| L08 | 1.000 | 1.000 | 1.000 | 1.000 | 1.000 | 1.000 | 0.148 |

All Insignificant

### Lutein

Comparison of var2 by var1 (Bonferroni)

Row Mean-|

Col Mean | L01 L02 L03 L04 L05 L06 L07

|     |       |       |        |        |        |       |        |
|-----|-------|-------|--------|--------|--------|-------|--------|
|     |       |       |        |        |        |       |        |
|     |       |       |        |        |        |       |        |
| L02 | 0.000 |       |        |        |        |       |        |
| L03 | 0.000 | 0.000 |        |        |        |       |        |
| L04 | 0.000 | 0.000 | 0.000  |        |        |       |        |
| L05 |       | 0.000 | 0.000  | 1.000* | 0.000  |       |        |
| L06 | 0.000 | 0.000 | 0.000  | 0.000  | 0.000  |       |        |
| L07 | 0.000 | 0.000 | 1.000* | 0.000  | 1.000* | 0.000 |        |
| L08 | 0.000 | 0.000 | 1.000* | 0.000  | 1.000* | 0.000 | 1.000* |

\* Insignificant (L03-L05, L03-L07, L03-L08, L05-L07, L05-L08, L07-L08)

### β-Cryptoxanthin

Comparison of var3 by var1 (Bonferroni)

Row Mean-|

Col Mean | L01 L02 L03 L04 L05 L06 L07

|     |       |         |         |         |         |         |         |         |
|-----|-------|---------|---------|---------|---------|---------|---------|---------|
|     |       |         |         |         |         |         |         |         |
|     |       |         |         |         |         |         |         |         |
| L02 | 1.000 |         |         |         |         |         |         |         |
| L03 |       | 0.000** | 0.000** |         |         |         |         |         |
| L04 |       | 1.000   | 1.000   | 0.000** |         |         |         |         |
| L05 |       | 1.000   | 1.000   | 0.000** | 1.000   |         |         |         |
| L06 |       | 1.000   | 1.000   | 0.000** | 1.000   | 1.000   |         |         |
| L07 | 1.000 | 1.000   | 0.000** | 1.000   | 1.000   | 1.000   |         |         |
| L08 |       | 0.000** | 0.000** | 0.884   | 0.000** | 0.000** | 0.000** | 0.000** |

\*\* Significant (L01-L03, L01-L08, L02-L03, L02-L08, L03-L04, L03-L05, L03-L06, L03-L07, L05-L08, L06-L08, L07-L08)

### a-Carotene

Comparison of var4 by var1 (Bonferroni)

Row Mean-|

Col Mean | L01 L02 L03 L04 L05 L06 L07

|     |        |        |        |        |        |        |       |  |
|-----|--------|--------|--------|--------|--------|--------|-------|--|
|     |        |        |        |        |        |        |       |  |
|     |        |        |        |        |        |        |       |  |
| L02 | 0.000  |        |        |        |        |        |       |  |
| L03 | 0.003  | 0.000  |        |        |        |        |       |  |
| L04 | 0.678* | 0.000  | 0.478* |        |        |        |       |  |
| L05 | 0.000  | 1.000* | 0.000  | 0.000  |        |        |       |  |
| L06 | 0.000  | 1.000* | 0.000  | 0.000  | 1.000* |        |       |  |
| L07 | 0.000  | 1.000* | 0.000  | 0.000  | 1.000* | 1.000* |       |  |
| L08 | 0.005  | 0.000  | 1.000* | 0.840* | 0.000  | 0.000  | 0.000 |  |

\* Insignificant (L01-L04, L02-L05, L02-L06, L02-L07, L03-L04, L03-L08, L04-L08, L05-L06, L05-L07, L06-L07)

### β-Carotene

Comparison of var5 by var1 (Bonferroni)

Row Mean-|

Col Mean |      L01      L02      L03      L04      L05      L06      L07

-----+-----  
-----

|     |       |        |        |        |       |       |       |
|-----|-------|--------|--------|--------|-------|-------|-------|
| L02 |       | 0.000  |        |        |       |       |       |
| L03 |       | 0.000  | 1.000* |        |       |       |       |
| L04 | 0.000 | 0.000  | 0.000  |        |       |       |       |
| L05 | 0.000 | 1.000* | 1.000* | 0.000  |       |       |       |
| L06 |       | 0.000  | 0.000  | 0.000  | 0.000 | 0.000 |       |
| L07 | 0.000 | 0.000  | 0.000  | 1.000* | 0.000 | 0.000 |       |
| L08 | 0.001 | 0.000  | 0.000  | 0.000  | 0.000 | 0.000 | 0.000 |

\* Insignificant (L02-L03, L02-L05, L03-L05, L04-L07)
